# Supplementary material for: Publication trends of shared decision making in 15 high impact medical journals: a full-text review with bibliometric analysis
Source: PubMed Central journal article supplement (PMC4136407; doi:10.1186/1472-6947-14-71), 2014-08-09
Supplement: 1472-6947-14-71-S1.pdf [file 1472-6947-14-71-S1.pdf]

**Additional Table S1. Selection of 15 journals in general internal medicine**

| Rank  | Journal                                     | 5-year impact factor (ISI* 2010) | Reason of exclusion |
|-------|---------------------------------------------|----------------------------------|---------------------|
| 1     | The New England Journal of Medicine         | 52.36                            |                     |
| 2     | The Lancet                                  | 32.50                            |                     |
| 3     | Journal of the American Medical Association | 29.31                            |                     |
| 4     | Annals of Internal Medicine                 | 16.76                            |                     |
| Excl. | Plos Medicine                               | 14.97                            | Start after 1996    |
| 5     | British Medical Journal                     | 11.94                            |                     |
| Excl. | The Annual Review of Medicine               | 10.89                            | Only reviews        |
| 6     | Archives of Internal Medicine               | 10.39                            |                     |
| 7     | Canadian Medical Association Journal        | 8.07                             |                     |
| Excl. | Cochrane Database of Systematic Reviews     | 6.35                             | Only reviews        |
|       | Medicine                                    | 5.91                             | Only reviews        |
| 8     | Journal of Internal Medicine                | 5.61                             |                     |
| 9     | The American Journal of Medicine            | 5.11                             |                     |
| 10    | Mayo Clinic Proceedings                     | 5.03                             |                     |
| 11    | American Journal of Preventive Medicine     | 4.99                             |                     |
| Excl. | The Annals of Family Medicine               | 4.97                             | Start after 1996    |
| 12    | Annals of Medicine                          | 4.67                             |                     |
| 13    | Journal of General Internal Medicine        | 3.62                             |                     |
| 14    | Preventive Medicine                         | 3.52                             |                     |
| Excl. | British Medical Bulletin                    | 3.37                             | Only reviews        |
| 15    | Journal of Pain and Symptom Management      | 3.19                             |                     |

\* ISI Web of Knowledge Journal Citation Reports, Thomson Reuters, 2010. Available from: <http://admin-apps.webofknowledge.com/JCR/JCR>.
